# Supplementary material for: The Effect of External Treatment of Arabidopsis thaliana with Plant-Derived Stilbene Compounds on Plant Resistance to Abiotic Stresses
Source: MDPI journal article supplement (doi:10.3390/plants13020184), 2024-01-10
Supplement: s1 [file s1]

**Table S1.** Primers for expression analysis of some genes involved in the regulation of phytohormone metabolism by real-time quantitative PCR (qRT-PCR)

| #         | Gene (phytohormone)                                                              | Function                                                                                                                                                           | Primers                                                                                                                                                                  | GeneBank                      | References                                                     |
|-----------|----------------------------------------------------------------------------------|--------------------------------------------------------------------------------------------------------------------------------------------------------------------|--------------------------------------------------------------------------------------------------------------------------------------------------------------------------|-------------------------------|----------------------------------------------------------------|
| 1         | Nitrilase 1, AtNIT1 (auxin)                                                      | NIT1-subfamily has been associated with the conversion of indole-3-acetonitrile into the major plant growth hormone, indole-3-acetic acid (IAA)                    | 5'GGC GTT CAT AAC GAA GAA GGG CGT G,<br>5'TTC CTT CTC TAT GGC TCC CAT TAC C                                                                                              | NM_180680.3                   | Lehmann et al. 2017                                            |
| 2         | Tryptophan amonotransferase of Arabidopsis 1, AtTAA1 (auxin)                     | TAA1 – involved in the shade-induced production of indole-3-pyruvate, a precursor to IAA, a biologically active auxin                                              | 5'AAC GCT GCG ACG GAG GAT CG,<br>5'CGT GGA CGG CGG CTT GAC AA                                                                                                            | NM_105724.3                   | Sato et al. 2022                                               |
| 3         | Flavin monooxygenases, AtYUCCA1 (auxin)                                          | YUCCA1 – the member of the YUCCA-family, are the main players in auxin biosynthesis                                                                                | 5'TCC GCA TCG CTC CAA GGT TC,<br>5'GGA AGT ATG GAT CTG CGT TCT CAC C                                                                                                     | XP_002869265.2                | Sato et al. 2022                                               |
| 4,<br>5   | Cytokinin oxidase 4 and 5, AtCKX4 and AtCKX5 (cytokinins)                        | CKX4 and CKX5 – catalyzes the irreversible degradation of cytokinins and in many plant species is responsible for the majority of metabolic cytokinin inactivation | <u>CKX4</u> 5'TGG GTG GAT GTT CTG AAG GCG,<br>5'ACG TTA CTA ATC TGA GGG CCG T;<br><u>CKX5</u> 5'GAG CCA TTG GCC GTG CTT CA,<br>5'AAC CAC CAC ACC GTT CCT CCC             | NM_001341977.1<br>NM_106199.5 | Mok, Mok, 2001;<br>Werner et al. 2003;<br>Bartrina et al. 2011 |
| 6         | Cytochrome P450 monooxygenase, AtCYP735A2 (cytokinins)                           | CYP735A2 – cytochrome P450 monooxygenases (P450s) that catalyze the biosynthesis of trans-Zeatin                                                                   | 5'CTA AAC CCC GTC TCC TCA CC,<br>5'CTC TTC CCA TAT TGT TTG GAC C                                                                                                         | NM_105381.5                   | Takei et al. 2004                                              |
| 7         | Cytokinin N-glucosyltransferase, AtUGT76C2 (cytokinins)                          | UGT76C2 – encodes a cytokinin N-glucosyltransferase that is involved in cytokinin homeostasis and cytokinin response in planta through cytokinin N-glucosylation   | 5'CCA TTA CCG TGA TCC ACA CG,<br>5'CAC GAA ACG GAG ACT CAG CG                                                                                                            | NM_120668.4                   | Wang et al. 2011                                               |
| 8         | Gibberellin 3 beta-hydroxylase, AtGA3ox2 (gibberellin)                           | AtGA3ox2 – encodes a protein with gibberellin 3 beta-hydroxylase activity, step in gibberellin biosynthesis                                                        | 5'CTG CCG CTC ATC GAC CTC,<br>5'AGC ATG GCC CAC AAG AGT G                                                                                                                | NM_106683.2                   | Curaba et al. 2004                                             |
| 9         | Gibberellin 20-oxidase, AtGA20ox2 (gibberellin)                                  | AtGA20ox2 – encodes gibberellin 20-oxidase. Involved in gibberellin biosynthesis                                                                                   | 5'AGA AAC CTT CCA TTG ACA TTC CA,<br>5'AGA GAT CGA TGA ACG GGA CG                                                                                                        | NM_124560.4                   | Plackett et al. 2012                                           |
| 10        | 9-cis-epoxycarotenoid dioxygenase, AtNCED3 (abscisic acid)                       | NCED3 – encodes 9-cis-epoxycarotenoid dioxygenase, a key enzyme in the biosynthesis of abscisic acid (ABA)                                                         | 5'AGCTAACCCACTTCACGAGC,<br>5'CCAATTGACGTTCCCTGAAC                                                                                                                        | NM_112304.3                   | Behnam et al. 2013                                             |
| 11,<br>12 | Zeaxanthin epoxidase, AtABA1 and xanthoxin dehydrogenase, AtABA2 (abscisic acid) | ABA1 and ABA2 are enzymes involved in the biosynthesis of abscisic acid                                                                                            | <u>ABA1</u> 5'GCT ATG AAG GTG ATC TGC TTG TGG,<br>5'TTC ATA CCA TTT GGA GCA TCA GC;<br><u>ABA2</u> 5'ATT GAT CAC TGG AGG AGC CAC AG,<br>5'ATT ACG AAT ATC AGG GCA CGG TG | NM_180954.3,<br>NM_104113     | Milborrow 2001                                                 |
| 13        | Molybdenum cofactor sulfurase, AtABA3 (abscisic acid)                            | ABA3 - encodes molybdenum cofactor sulfurase. Involved in the conversion of ABA-aldehyde to ABA, the last step of abscisic acid biosynthesis                       | 5'TCACATCATTTGGGCGGTTGT,<br>5'AGATCTTCCCTTTACTCTC                                                                                                                        | NM_001332230                  | Barrero et al. 2006                                            |

|    |                                                                 |                                                                                                                 |                                                   |           |                                     |
|----|-----------------------------------------------------------------|-----------------------------------------------------------------------------------------------------------------|---------------------------------------------------|-----------|-------------------------------------|
| 14 | Ethylene-insensitive transmembrane protein, AtEIN2 (ethylene) 2 | EIN2 – transmembrane protein of unknown biochemical activity, involved in ethylene signal transduction          | 5'GAGAGTCGGCCTGAGCTTTG,<br>5'GTGGCTCGCTGGAATCTGA  | AF141202  | Binder, 2020;<br>Alonso et al. 1999 |
| 15 | Ethylene-insensitive transcription factor, AtEIN3 (ethylene) 3  | EIN3 – a nuclear transcription factor that initiates downstream transcriptional cascades for ethylene responses | 5'ACAGTAGCGGCAACAGGTTC,<br>5'TTGCTGCTTCTGCTGCATTC | NM_112968 | Binder et al. 2004;<br>Binder, 2020 |

**Table S2.** Primers for expression analysis of some stress-responsive genes by real-time quantitative PCR (qRT-PCR)

| #                         | Gene                                                                                                 | Function                                                                                                                                                                    | Primers                                                                                                                                                                                                                                                                                                                                                                                                                                   | GeneBank                                                                     | References                                        |
|---------------------------|------------------------------------------------------------------------------------------------------|-----------------------------------------------------------------------------------------------------------------------------------------------------------------------------|-------------------------------------------------------------------------------------------------------------------------------------------------------------------------------------------------------------------------------------------------------------------------------------------------------------------------------------------------------------------------------------------------------------------------------------------|------------------------------------------------------------------------------|---------------------------------------------------|
| 1,<br>2,<br>3,<br>4,<br>5 | <i>Arabidopsis thaliana</i> abscisic insensitive genes (ABI), AtABI1, AtABI2, AtABI3, AtABI4, AtABI5 | Protein phosphatases (ABI1,2) or transcription factors (ABI3,4,5), products of these genes are involved in the transmission of the abscisic acid signal                     | <u>ABI1</u> 5'AGC TGC TGA TAT AGT CGT CGT TGA TA, 5'GAG GAT CAA ACC GAC CAT CTA ACA;<br><u>ABI2</u> 5'GTT CTT GTT CTG GCG ACG GAG C, 5'CCA TTA GTG ACT CGA CCA TCA AG;<br><u>ABI3</u> 5'CAC AGC CAG AGT TCC TTC CTT TAC T, 5'TAG TTG CTG AGG AAC ACA AAC GG;<br><u>ABI4</u> 5'ACA AGA TTT CTG ACA TCG AGC TCA C, 5'ATC CAT CTC CAA CCA TAT AAC CCG;<br><u>ABI5</u> 5'AGA GGG ATA GCG AAC GAG TCT AGT C, 5'GTT CGG GTT TGG ATT AGG TTT AGG | NM_118741.3;<br>NM_001345230;<br>NM_113376.4;<br>AF040959.1;<br>NM_001336591 | Leung et al. 1997;<br>Brocard-Gifford et al. 2004 |
| 6                         | <i>A. thaliana</i> gene of abscisic-binding factor (ABF), AtABF3                                     | AtABF3 is involved in the stress response to drought, oxidative, cold, heat stress through the regulation of genes involved in stress                                       | 5'CAA CAT CAG CAA TGG TAA TAG TGG A, 5'CGT CCG AGG CAA GGT AAG TG                                                                                                                                                                                                                                                                                                                                                                         | NM_119562                                                                    | Wang et al. 2016                                  |
| 7                         | <i>A. thaliana</i> C-repeat/DRE binding factor 1 (CBF1), AtCBF1                                      | Transcriptional activator AtCBF1 binds to the DRE/CRT regulatory element and induces cold-regulated ( <i>COR</i> ) gene expression increasing plant freezing tolerance      | 5'GTT TGG GAT GCC GAC TTT GTT, 5'ACC ATC TCC TTC GCC GTC AT                                                                                                                                                                                                                                                                                                                                                                               | FJ169278                                                                     | Heidari 2019                                      |
| 8,<br>9                   | Dre-binding protein 1A and 2A, AtDREB1A, AtDREB2A                                                    | Transcription factor DREB1A and DREB2A regulates gene transcription in conditions of water shortage, high salt concentrations and cold                                      | <u>DREB1A</u> 5'TGC GTT GGC GTT TCA GGA TG, 5'CAA ACT CGG CAT CTC AAA CAT CG;<br><u>DREB2A</u> 5'CTG GAG AAT GGT GCG GAA GA, 5'CAG ATA GCG AAT CCT GCT GTT GT                                                                                                                                                                                                                                                                             | NM_118680;                                                                   | Mizoi et al. 2019                                 |
| 10,<br>11                 | Cold-regulated genes ( <i>COR</i> ), AtCOR15, AtCOR47                                                | <i>COR</i> genes encode dehydrins, high hydrophilicity prevent the loss of water by the cell and stabilize cellular proteins and their expression is induced by cold stress | <u>COR15</u> 5'AAC TCT GCC GCC TTG TTT GC, 5'AGT CGT TGA TCT ACG CCG CTA A;<br><u>COR47</u> 5'GAA AAG CTT CAC CGA TCC AA, 5'TAC CGG GAT GGT AGT GGA AA                                                                                                                                                                                                                                                                                    | NM_120623.3;<br>NM_101894.4                                                  | Ingram et al. 1996;<br>Thomashow et al. 1998      |
| 12                        | Dehydrin gene Rab18, AtRab18                                                                         | Overexpression of Rab18 dehydrin gene increased the tolerance of arabidopsis transgenic plants to cold stress                                                               | 5'GCA GTA TGA CGA GTA CGG AAA TCC, 5'CCT TGT CCA TCA TCC GAG CTA GA                                                                                                                                                                                                                                                                                                                                                                       | NM_126038.3                                                                  | Puhakainen et al. 2004                            |
| 13                        | Pyrroline-5-carboxylate synthase gene, AtP5CS2                                                       | AtP5CS2 encoding the enzyme in proline (osmolyte) biosynthesis pyrroline-5-carboxylate synthase (P5CS)                                                                      | 5'AGC AGC CTG TAA TGC GAT GG, 5'AAG TGA CGC CTT TGG TTT GC                                                                                                                                                                                                                                                                                                                                                                                | OX461207                                                                     | Fabro et al. 2004                                 |

|                  |                                                                       |                                                                                                                                                                                                                                                                                                        |                                                                                                                                                                                                                                |                                           |                                             |
|------------------|-----------------------------------------------------------------------|--------------------------------------------------------------------------------------------------------------------------------------------------------------------------------------------------------------------------------------------------------------------------------------------------------|--------------------------------------------------------------------------------------------------------------------------------------------------------------------------------------------------------------------------------|-------------------------------------------|---------------------------------------------|
| 14               | Gene of late embryogenesis abundant (LEA)-like protein, AtLEA         | AtLEA gene encodes dehydrin, overexpression of LEA genes in yeast and rice increased resistance to water deficiency                                                                                                                                                                                    | 5'GAG CAT CTT CGT CGG TCT GGA,<br>5'CTC GTG AGG TTG GTC GGT AGT G                                                                                                                                                              | NM_127721.4                               | Mowla et al. 2006; Smith and Graether, 2022 |
| 15,<br>16,<br>17 | Catalase, AtCAT1, Superoxide dismutases, AtCSD1, AtCSD2               | Antioxidant genes:<br>CAT1 - catalase 1;<br>CSD1 - cytosolic superoxide dismutases;<br>CSD2 - chloroplastic superoxide dismutases                                                                                                                                                                      | CAT1 5'AGC GCT TTC GGA GCC TCG TG,<br>5'GGC CTC ACG TTA AGA CGA GTT GC;<br>CSD1 5'GTT GGT AGG GCT GTT GTT GTC,<br>5'TGG ACC TCC TTA TTA CAT CAA;<br>CSD2 5'TTA GTC TGA CCA CTG GAA ACG C,<br>5'GGA TGC TAA ATA AAC CAA AAT GTA | NM_101914.4;<br>LR782542.1;<br>LR782543.1 | Yang et al. 2014;<br>Zhou et al. 2022       |
| 18               | Protein kinase gene, AtKIN1                                           | The KIN1 gene product is a Ser/Thr protein kinase Low temperatures and exogenous abscisic acid induce KIN1 gene expression.                                                                                                                                                                            | 5'CCA ACA AGA ATG CCT TCC AAG C,<br>5'GCT GCC GCA TCC GAT ACA CT                                                                                                                                                               | NM_121601.3                               | Kurkela and Borg-Franck 1992                |
| 19               | Gene of lipid transfer protein, AtLtp3                                | Ltp - lipid transfer protein, enhances drought tolerance by remodeling lipid profiles                                                                                                                                                                                                                  | 5'TTT CGC TTT GAG GTT CTT C,<br>5'TGG AAT GCT AAC ACC GC                                                                                                                                                                       | NM_125323.5                               | Zhang et al. 2022                           |
| 20,<br>21        | Ion transporter genes, AtNHX1, AtSOS1,                                | NHX1 and SOS1 are stress-responsive ion transporter genes (vacuolar and plasma membrane Na <sup>+</sup> /H <sup>+</sup> antiporters, respectively) whose overexpression in transgenic plants enhanced photoprotection capacity under high salinity and drought conditions and increased salt tolerance | NHX1 5'CCG TGC ATT ACT ACT GGA GAC AAT,<br>5'GTA CAA AGC CAC GAC CTC CAA;<br>SOS1 5'TCG TTT CAG CCA AAT CAG AAA GT,<br>5'TTT GCC TTG TGC TGC TTT CC                                                                            | NM_122597.3;<br>NM_126259.4               | Liu et al. 2010;<br>Yue et al. 2012         |
| 22               | Responsive to desiccation (RD), AtRD22                                | No information on the physiological roles. AtRD22 - member of the plant-specific BURP domain family involved in <i>A. thaliana</i> drought tolerance                                                                                                                                                   | 5'CAT GAG TCT CCG GGA GGA AGT G,<br>5'CGG CTG GGG TAA AGA AGT TGT C                                                                                                                                                            | NM_122472.4                               | Harshavardhan et al. 2014                   |
| 23               | Responsive to desiccation (RD), AtRD26                                | RD26 encodes a NAC transcription factor whose transcription is induced in response to drought and high salinity                                                                                                                                                                                        | 5'GAT GTG AAG TTA CTG ATG GGT GAA,<br>5'GCG AGC CAA GTC ACA AGG AG                                                                                                                                                             | NM_118875.4                               | Fujita et al. 2004                          |
| 24,<br>25        | Responsive to desiccation (RD), AtRD29a, AtRD29b,                     | No information on the physiological roles. Cold, drought, and salt induced both genes                                                                                                                                                                                                                  | RD29a 5'ATC ACT TGG CTC CAC TGT TGT TC,<br>5'ACA AAA CAC ACA TAA ACA TCC AAA G;<br>RD29b 5'GGA ATC CGA AAA CCC CAT AGT C,<br>5'GGA GTG AAG GAG ACG CAA CAA G                                                                   | NM_124610.3;<br>NM_124609.4               | Msanne et al. 2011                          |
| 26               | Ribulose-1,5-bisphosphate carboxylase/oxygenase large subunit, AtRbcL | Enzyme involved in light-independent part of photosynthesis, including the carbon fixation by which atmospheric carbon dioxide is converted by photosynthetic organisms to energy-rich molecules such as glucose                                                                                       | 5'GAA GCA GGG GCT GCG GTA G<br>5'TCT TCT CCT GGA ACG GGC TC                                                                                                                                                                    | MK525214                                  | Nivison and Stocking, 1983                  |

**Table S3.** The content of individual stilbenes in mg per g of the dry weight (DW) in the *Arabidopsis thaliana* plants

| #  | R time | Name                                    | Group of substances                      |
|----|--------|-----------------------------------------|------------------------------------------|
| 1  | 12.1   | Isorhanetin                             | Flavonoid (O-methylated flavonol)        |
| 2  | 12.6   | Indole-3-butyric acid                   | A plant hormone in the auxin family      |
| 3  | 13.2   | 7-Methysulfinylheptyl glucosinolate     | Glucosinolate                            |
| 4  | 14.4   | 3-Indolylmethyl glucosinolate           | Glucosinolate                            |
| 5  | 16.1   | Glucohirsutin                           | Glucosinolic acid and a sulfoxide        |
| 6  | 17.3   | 4-Methoxy-3-indolylmethyl glucosinolate | Glucosinolate                            |
| 7  | 17.8   | Sinapoyl hexoside                       | Glucosyl hydroxycinnamic acid            |
| 8  | 19     | Kaempferol hexose dideoxyhexose         | Flavonoid (flavonol)                     |
| 9  | 20.1   | Kaepferol-3-O-hexoside                  | Flavonoid (flavonol)                     |
| 10 | 21.3   | Kaepferol-3,7-O-diramnside              | Flavonoid (flavonol)                     |
| 11 | 21.6   | Sinapoyl malate                         | Sinapic acid ester, hydroxycinnamic acid |
| 12 | 24.7   | 1,2-di-O-Sinapoyl-beta-O-glucose        | Sinapic acid ester, hydroxycinnamic acid |
| 13 | 26.1   | Sinapic acid                            | Sinapic acid, hydroxycinnamic acid       |
